# Supplementary material for: Spatially resolved expression landscape and gene-regulatory network of human gastric corpus epithelium
Source: PubMed Central journal article supplement (PMC10319429; doi:10.1093/procel/pwac059), 2022-11-15
Supplement: pwac059_suppl_supplementary_materials.pdf [file pwac059_suppl_supplementary_materials.pdf]

### Supplemental Figure legends

#### **Fig. S1. Sampling information of human gastric corpus epithelium**

(A) Scatter plots showing the distribution of UMIs and genes across all used cells. The red lines indicate the thresholds of quality control.

(B) UMAP plots exhibiting the human corpus cells of the 10X (left) and STRT (right) datasets. Cells sampled from different patients are in different colors.

(C) Heatmap showing DEGs of each cluster in gastric corpus STRT dataset. The color key from purple to yellow indicates low to high expression levels, respectively.

(D) Violin plots exhibiting the expression of the representative marker genes of gastric cell type in the 10X dataset. Different cell types are in different colors.

(E) UMAP plots exhibiting the expression patterns of *LGR5* and *TNFRSF19* (Troy) in the 10X (left) and STRT (right) datasets. Red circles highlight the positive cells. The color key from grey to blue indicates low to high expression levels, respectively.

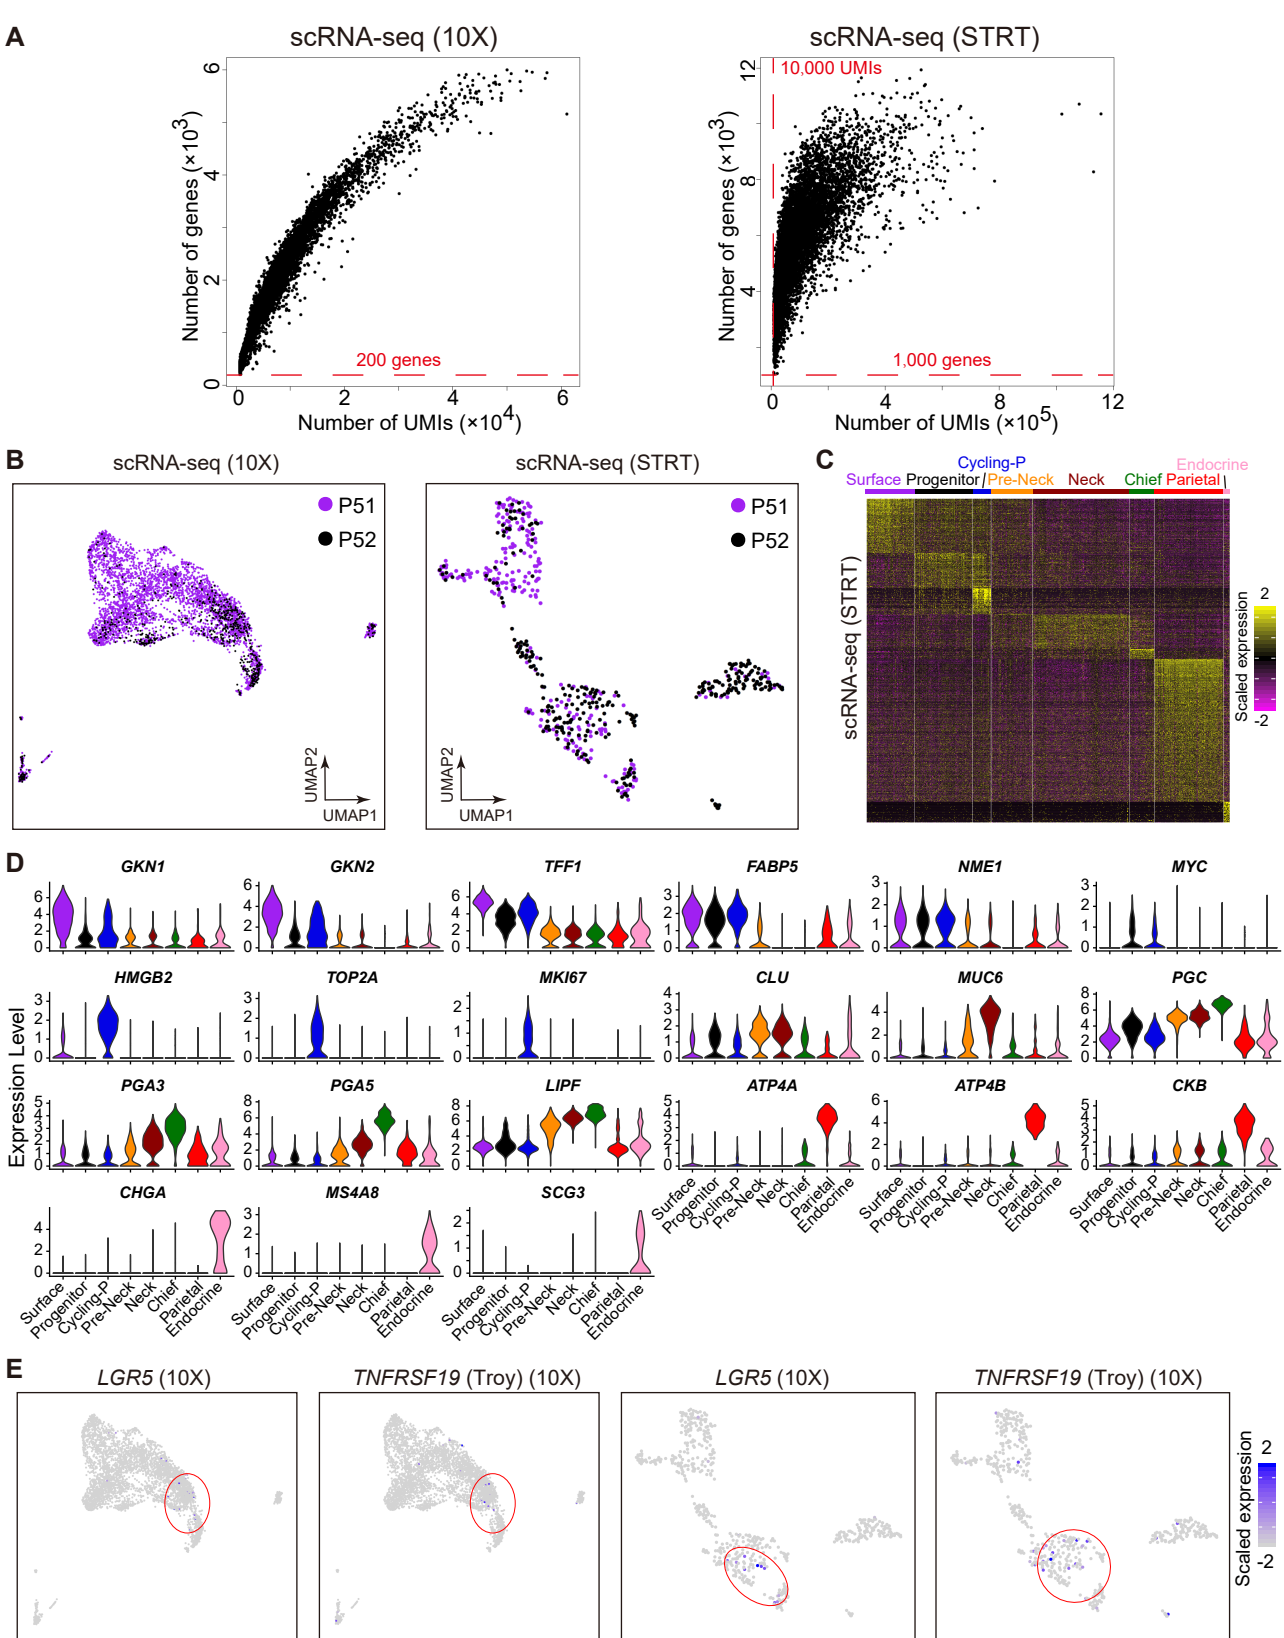



**Fig. S2. Clustering of spatial transcriptomics data**

(A) H&E staining of P54 sample section used for spatial transcriptomics.

(B) The expression pattern of *MUC5AC* and *MUC6* in P54 spots. The color key from blue to red indicates low to high expression levels, respectively.

(C) Heatmap showing DEGs of each cluster in P53 spatial transcriptomics. The color key from purple to yellow indicates low to high expression levels, respectively.

(D) Dotplots exhibiting representative marker genes in P53 spatial transcriptomics. The color key from white to purple indicates low to high expression levels, respectively. The circle size indicates the percentage of cells expressing a certain gene.

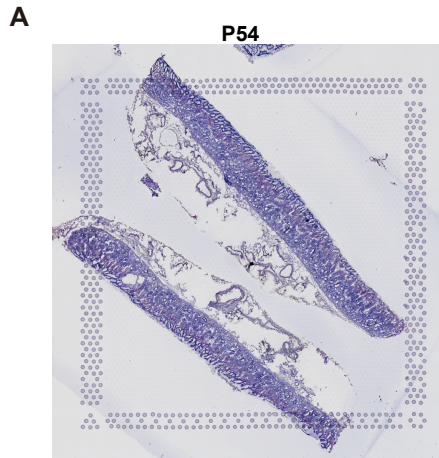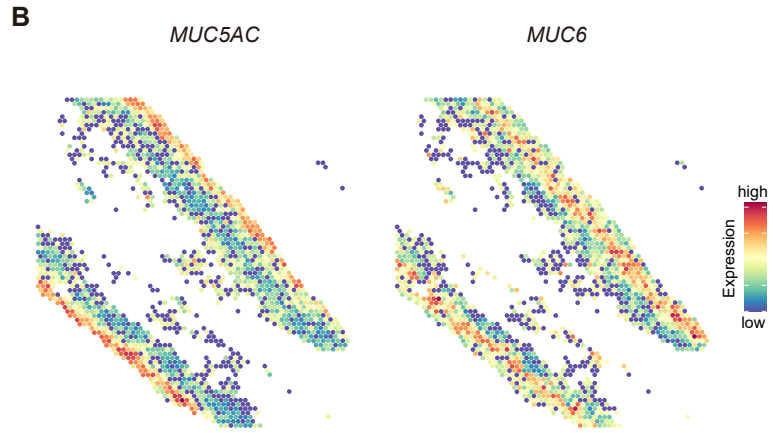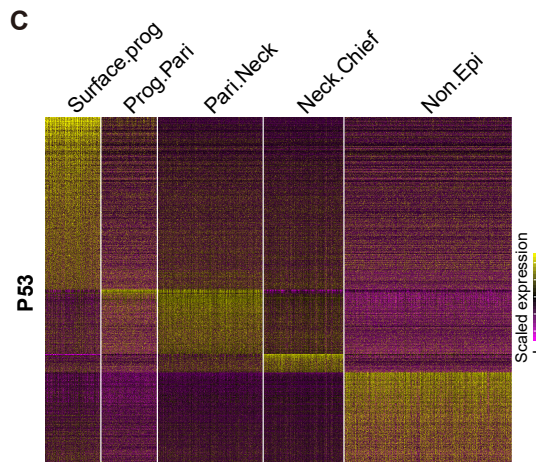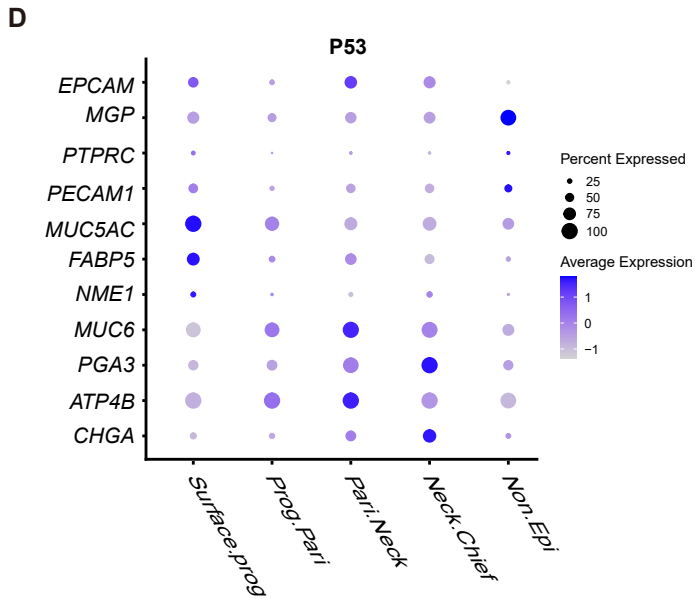

**Fig. S3. Gene expression landscapes of human ileal epithelium and differentiation trajectory of human corpus epithelium**

(A) UMAP visualization of human adult ileal epithelium. Cells are colored by patient information (left) and cell type information (right). TA: transit-amplifying; Mcell: microfold cell.

(B) Heatmaps displaying DEGs within each cluster. For the convenience of visualization, clusters exceeding 100 cells were down sampled to 100 cells. The color key from purple to yellow indicates low to high expression levels, respectively.

(C) Dotplot displaying the expression levels of representative marker genes of each cluster. Spot size indicates the percentage of cells expressing the gene within each cluster and color intensity denotes the expression levels of the gene.

(D) Four differentiation trajectories of human corpus stem/progenitor cells (left). On the right are heatmaps exhibiting the top 100 genes relevant to each trajectory. The color key from blue to red indicates low to high expression levels, respectively.

A

Human ileal epithelium (12,694 cells)

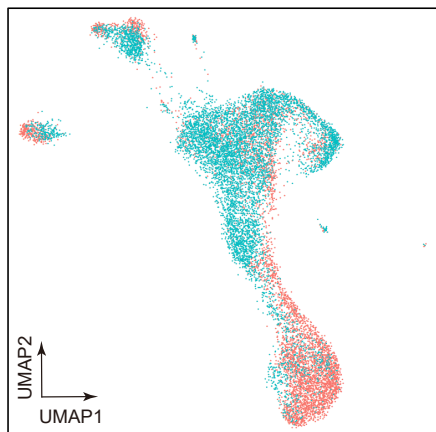

Patient:

● SI1

● SI2

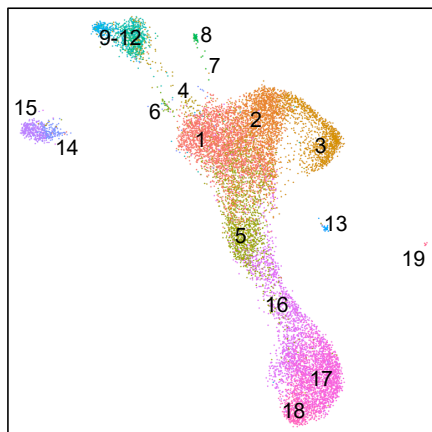

Cluster:

- 1\_Stem
- 2\_G1/S.TA
- 3\_G2/M.TA
- 4\_Secretory.TA
- 5\_Absorptive.TA
- 6\_Paneth
- 7\_Pre.Tuft
- 8\_Tuft
- 9\_Goblet.1
- 10\_Goblet.2
- 11\_Goblet.3
- 12\_Goblet.4
- 13\_Endocrine
- 14\_Mcell.1
- 15\_Mcell.2
- 16\_Pre.Enterocyte
- 17\_Enterocyte.1
- 18\_Enterocyte.2
- 19\_Immune

B

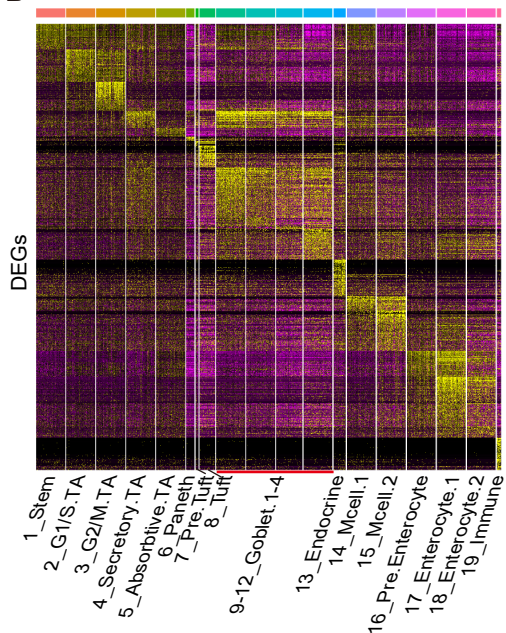

C

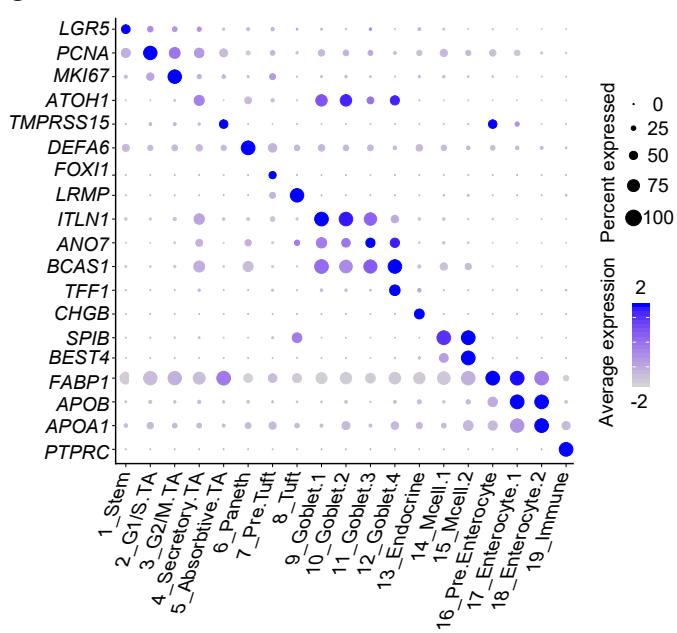

D

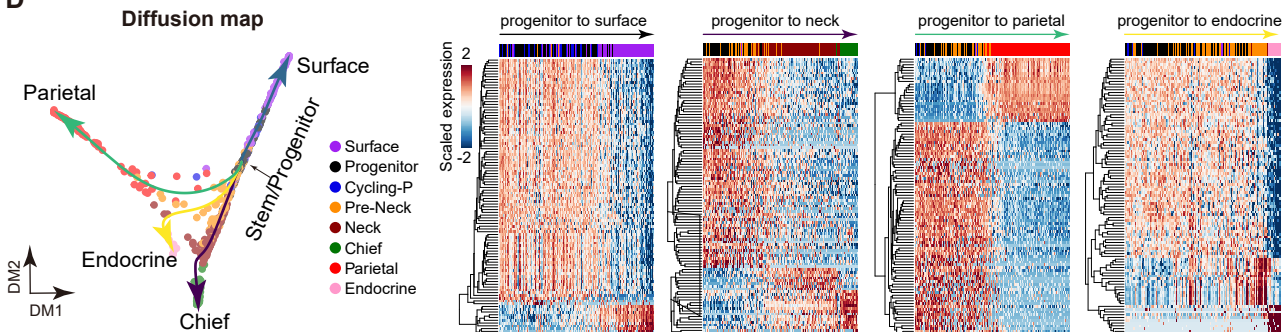

**Fig. S4. Gene ontology analysis of DEGs identified in gene knockdown experiments**

(A) Heatmap exhibiting the DEGs of *MYC*, *FABP5* and *NME1* knockdown group compared with negative control siRNA group (48h after transfection) (left). The right panel is the heatmap exhibiting the upregulated DEGs in the STRT scRNA-seq dataset. The color key from purple to yellow indicates low to high expression levels, respectively.

(B) Top enriched terms using the upregulated (left) and downregulated (right) DEGs of *MYC* siRNA group compared with negative control siRNA group.

(C) Top enriched terms using the upregulated (left) and downregulated (right) DEGs of *FABP5* siRNA group compared with negative control siRNA group.

(D) Top enriched terms using the upregulated (left) and downregulated (right) DEGs of *NME1* siRNA group compared with negative control siRNA group.

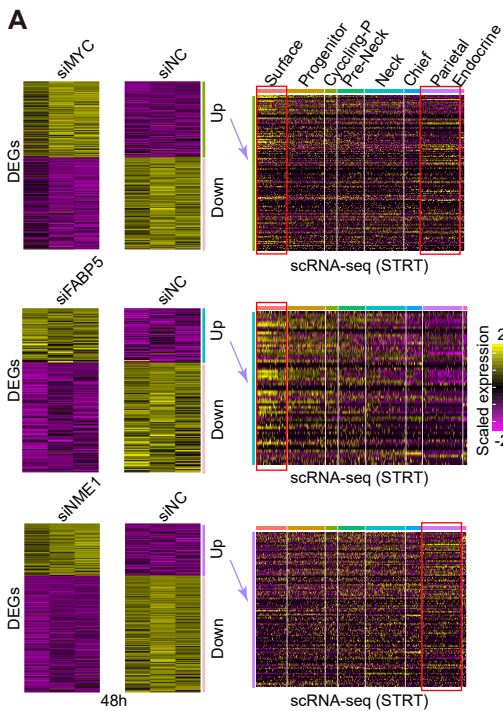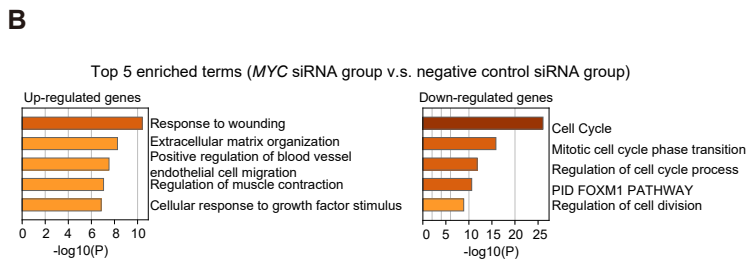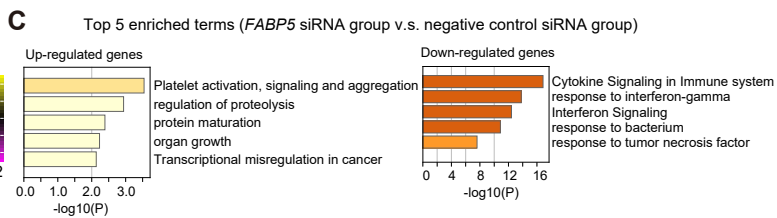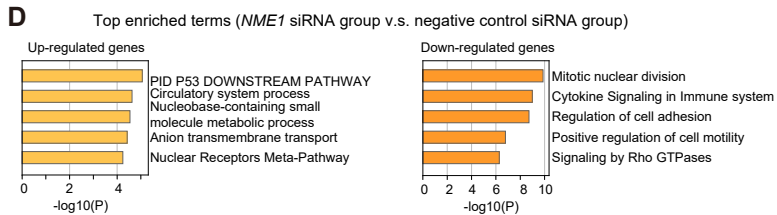

**Fig. S5. The function of *FABP5* and *NME1* for gastric cancers**

(A) RNAscope staining for *FABP5*, *NME1* and *MKI67* on gastric tumor sample from another patient. Scale bar: 1 mm.

(B) FACS analysis of representative control sample for apoptosis experiment.

(C) FACS analysis of representative gastric cancer cell line for apoptosis experiment.

(D) FACS analysis of representative gastric cancer cell line for cell cycle experiment.

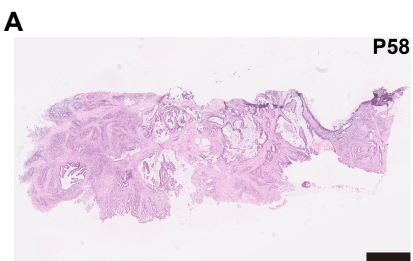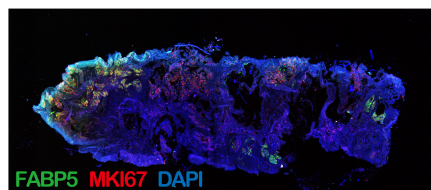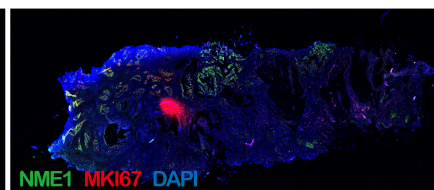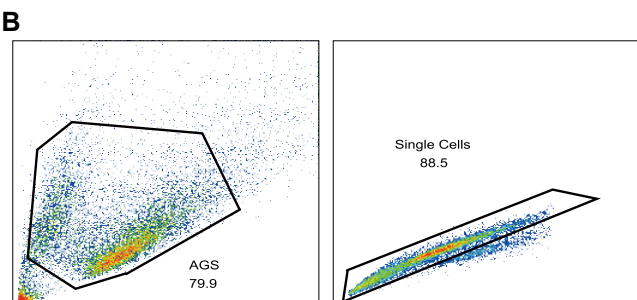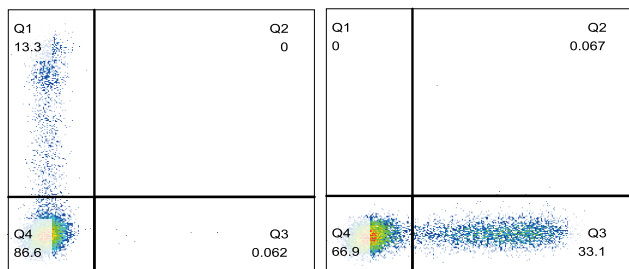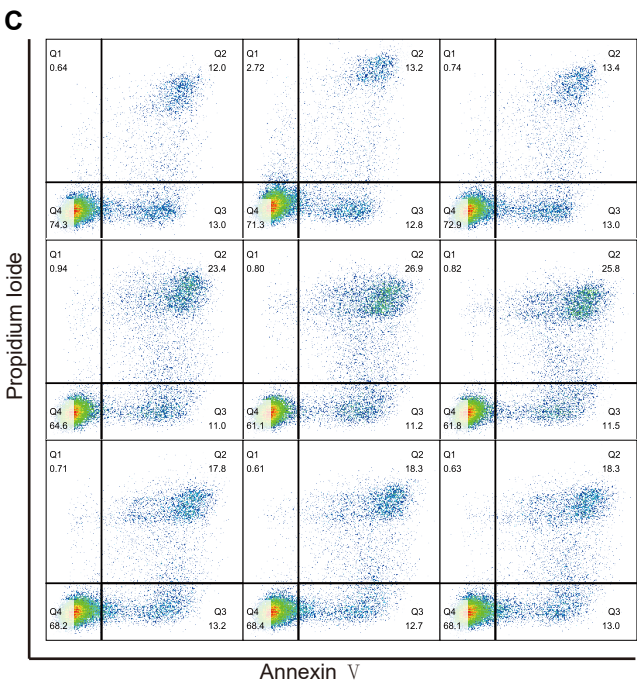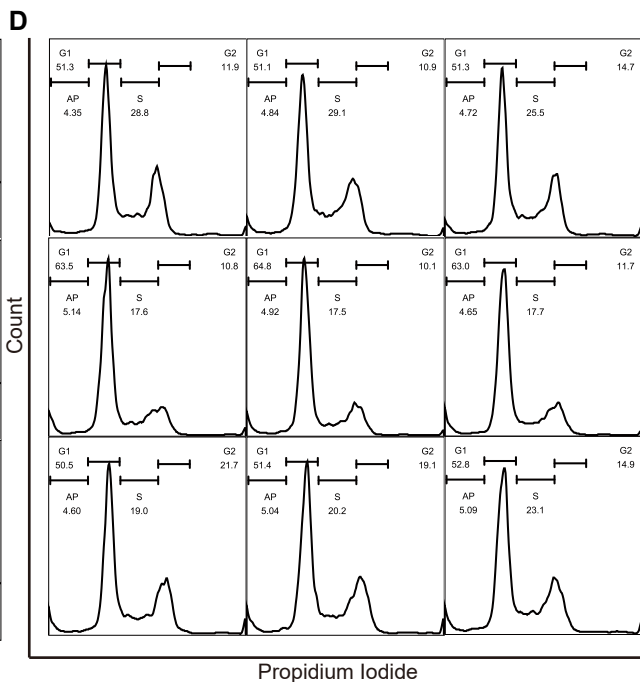



**Fig. S6. Genomic tracks exhibiting the accessibility of representative marker peaks in aggregated scATAC-seq clusters**

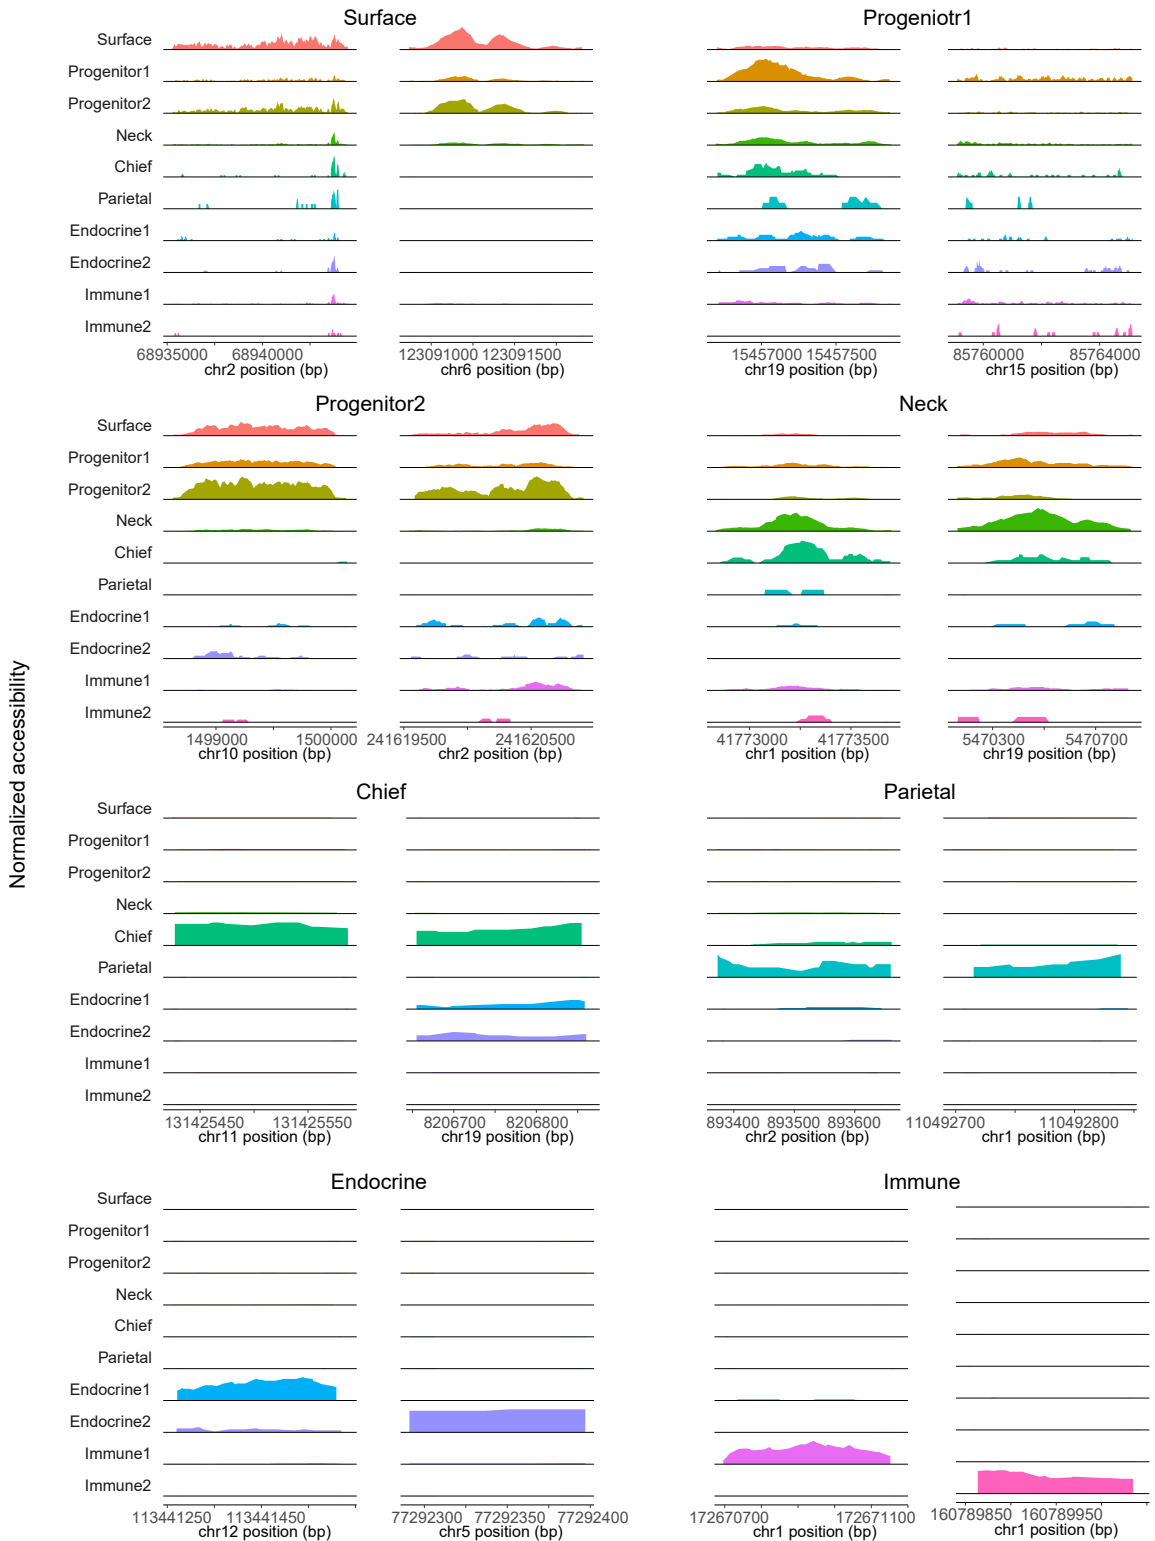

**Fig. S7. TF regulatory network of human gastric corpus epithelium**

(A) Heatmaps exhibiting the differentially activated TFs of aggregated scATAC-seq clusters. The color key from blue to red/yellow indicates low to high deviation score, respectively.

(B) Regulatory network of cell type specific TFs targeting the top 100 DEGs of human corpus epithelium. Genes are colored by cell type information.

(C) Heatmap exhibiting the MYC regulated genes overlapped with potential target genes and corpus DEG (left), which was identified by MYC knockdown siRNA compared with negative control siRNA after 48h. On the right is the heatmap exhibiting these genes in the STRT scRNA-seq dataset. The color key from purple to yellow indicates low to high expression levels, respectively.

**A**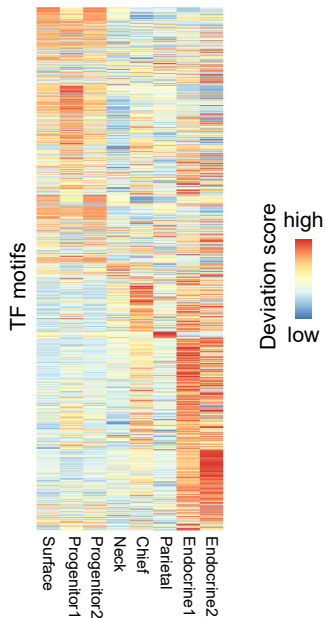**C**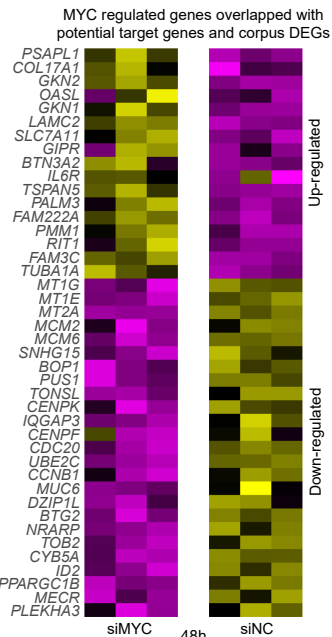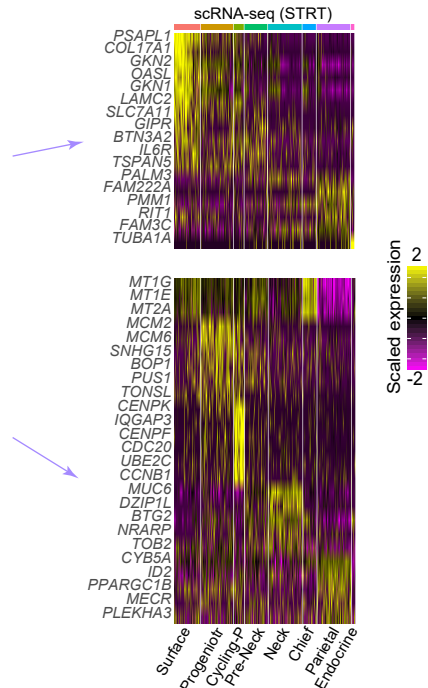**B**

### TF regulatory network

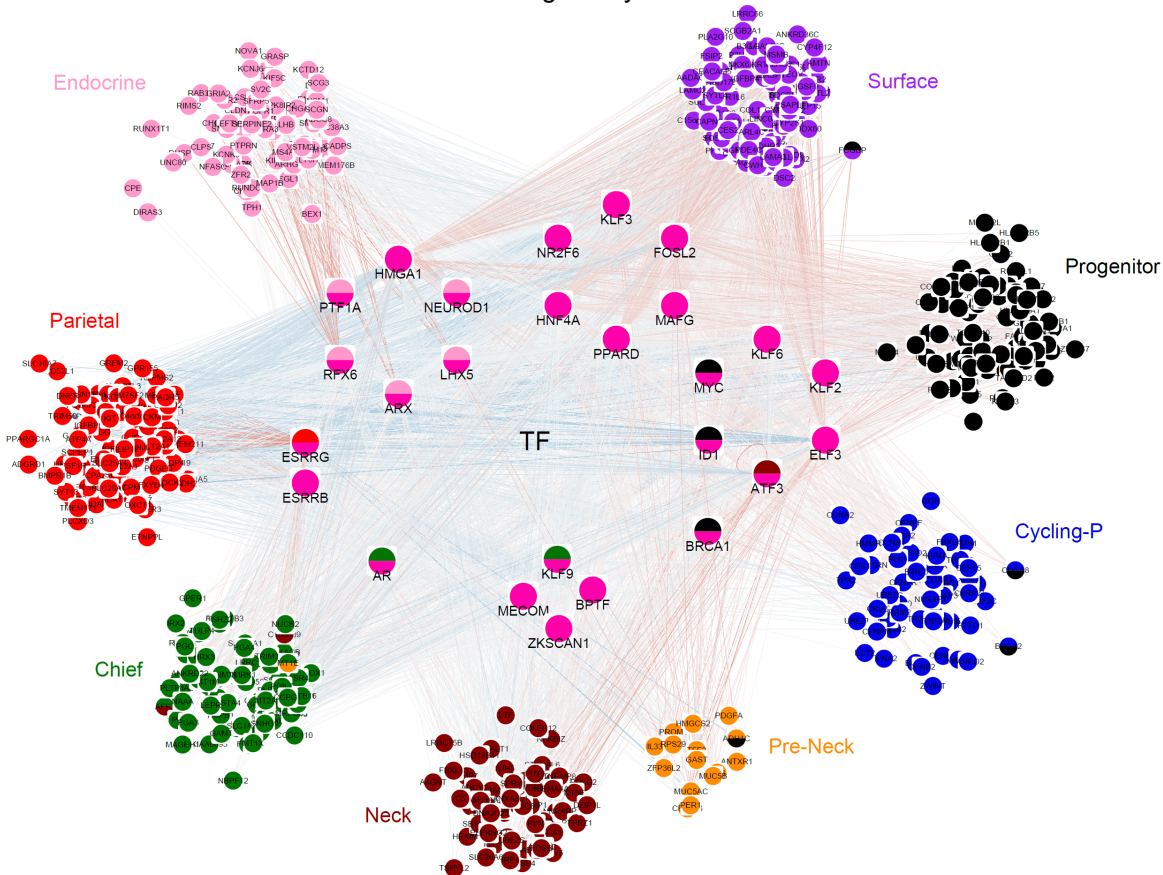

**Supplemental Table Legends**

**Supplemental Table 1. scRNA-seq of human gastric corpus epithelium**

**Supplemental Table 2. DEGs of human gastric corpus epithelium**

**Supplemental Table 3. Barcode information**

**Supplemental Table 4. Peak-to-genes result**
